# Supplementary material
Source: PubMed Central journal article supplement (PMC8206040)

A)

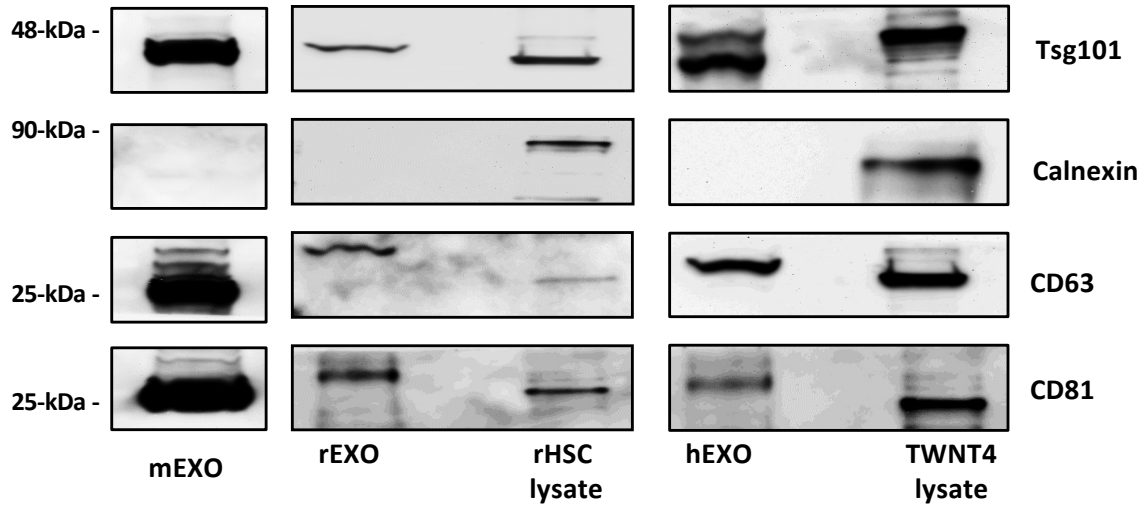

B)

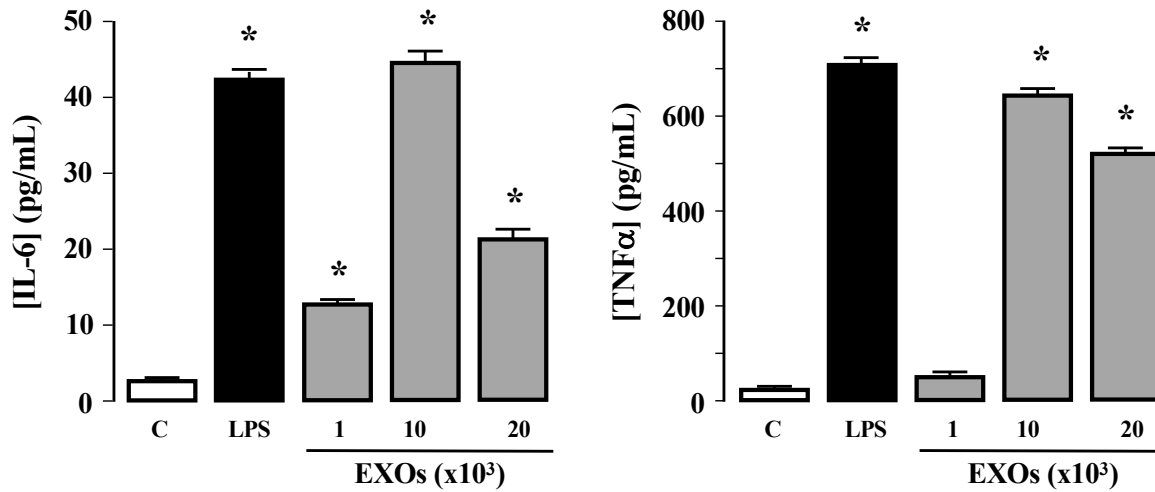

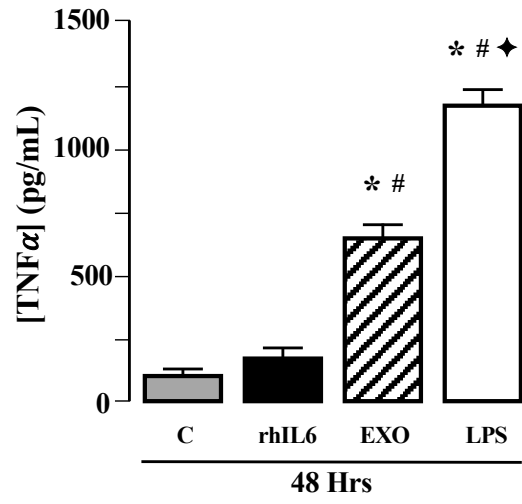

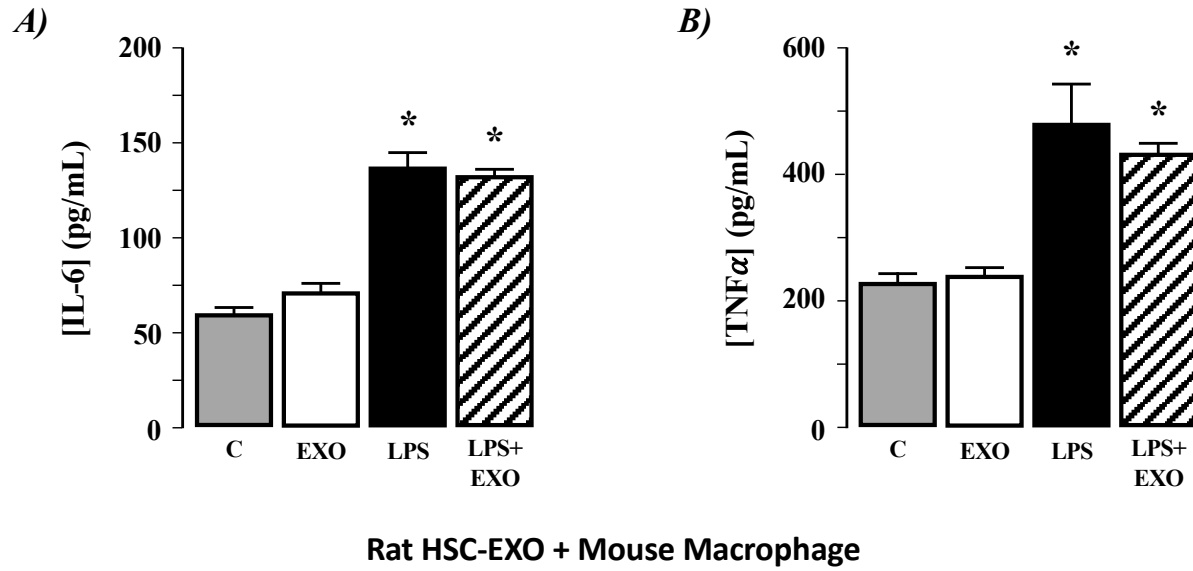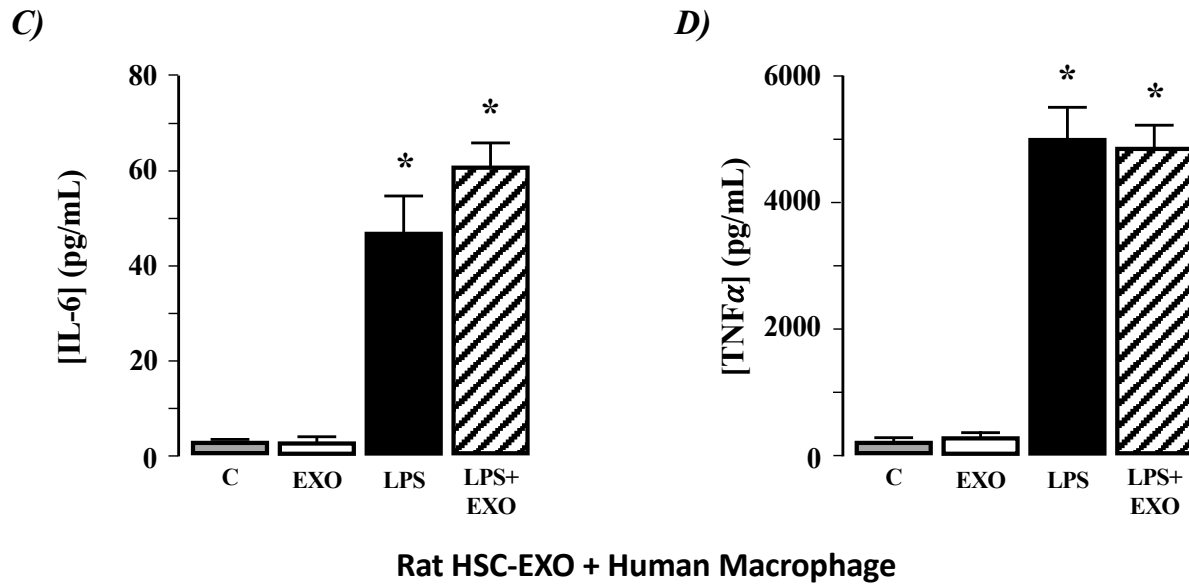

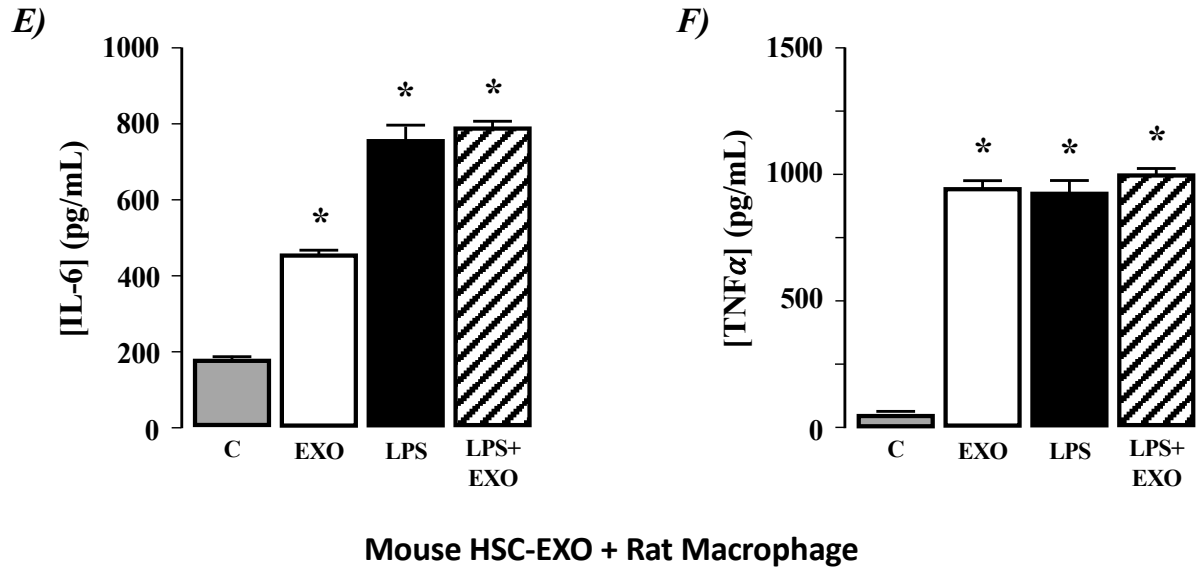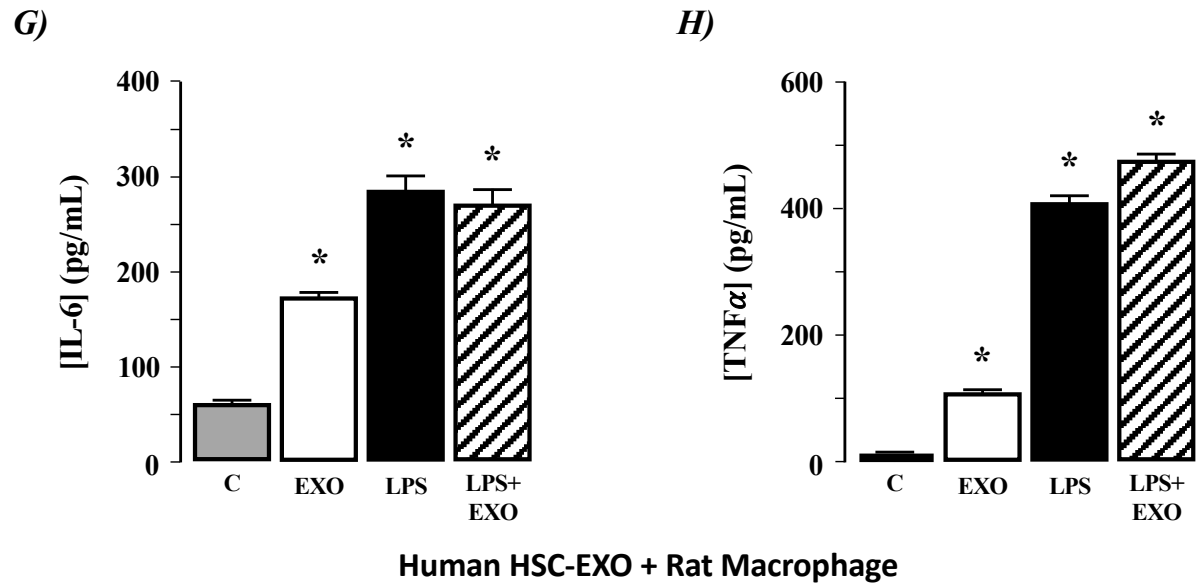

Supplement: NIHMS1708645-supplement-1.pdf [file NIHMS1708645-supplement-1.pdf]
